# Supplementary material for: Tracing online flood conversations across borders: A watershed level analysis of geo-social media topics during the 2021 European flood
Source: Copernicus journal article supplement (doi:10.5194/egusphere-2024-3255), 2024-12-12
Supplement: Supplementary file 1 [file egusphere-2024-3255-supplement.pdf]

## Supplementary material

Table S1. Complete list of relevant terms per each topic identified in the topic modelling.

| Topic Abbreviation | Relevant Terms                                                                                                         | Number of Tweets |
|--------------------|------------------------------------------------------------------------------------------------------------------------|------------------|
| Topic 1            | climate, change, crisis, climatecrisis, catastrophe, protection, energy, extreme, heat, climateactionnow               | 231              |
| Topic 2            | limburg, water, maas, high, flooding, venlo, valkenburg, maastricht, watersnood, south                                 | 719              |
| Topic 3            | cologne, intensity, precipitation, area, koelle                                                                        | 46               |
| Topic 4            | towards, direction, closed, near, blocked, bastogne, li, flooding, charleroi, travel                                   | 301              |
| Topic 5            | people, affected, flood, disaster, many, victims, floods, solidarity, help, thanks                                     | 594              |
| Topic 6            | country, poland, italy, uk, people, hunger, strike, schoenstatt, schoenstattorg, srebrenica                            | 300              |
| Topic 7            | pastoral, care, emergency, koblenz, mayen, mission, landkreismayenkoblenz, deployment, districtmayenkoblenz, operation | 10               |
| Topic 8            | mh, mystery, solved, youtube, check, video, judge, answers, research, questions                                        | 16               |
| Topic 9            | ahrweiler, flood, help, germany, donations, bonn, district, ahr, fire, people                                          | 445              |
| Topic 10           | electricity, power, warning, diesel, disaster, siren, areas, lives, without, outage                                    | 139              |
| Topic 11           | br, veghel, bob, upscaling, alarm, veldenweg, drunen, new, middle, large                                               | 17               |
| Topic 12           | vaccinated, vaccination, covid, corona, infections, pandemic, people, via, incidence, cases                            | 347              |
| Topic 13           | belgium, floods, liege, li, namur, meuse, dinant, water, flooding, city                                                | 389              |

|          |                                                                                                         |     |
|----------|---------------------------------------------------------------------------------------------------------|-----|
| Topic 14 | khuzestan, tigray, justice, people, defundaredes, liberenalos, freedom, kurdistan, iran, crime          | 225 |
| Topic 15 | samson, gesves, closed, towards, flooding                                                               | 8   |
| Topic 16 | hotton, tohogne, ardenne, roche, travel, direction, blocked, towards, flooding, accident                | 10  |
| Topic 17 | hertogenbosch, cooperation, found, injury, missing, police, transport, bbn, burgernet, accident         | 116 |
| Topic 18 | bless, god, amen, living, dead, lord, condolences, relatives, flees, crawls                             | 207 |
| Topic 19 | cuba, soscuba, venezuela, cuban, freedom, cubans, cubaesunadictadura, cambiodesistema, free, cubadecide | 121 |
| Topic 20 | ring, inner, accident, near, lane, outer, blocked, zellik, left, tervuren                               | 63  |
| Topic 21 | belgium, national, day, victims, mourning, solidarity, floods, silence, minute, netherlands             | 358 |
| Topic 22 | laschet, germany, merkel, chancellor, cdu, german, catastrophe, people, climate, nrw                    | 190 |
| Topic 23 | donations, help, donate, aid, flood, donation, thank, money, volunteers, distance                       | 245 |
| Topic 24 | neufch, teau, sunday, valjoly, sweets, wiese, nebach, mutt, saure, monday                               | 20  |
| Topic 25 | germany, flood, rhine, rain, heavy, water, erftstadt, nrw, cologne, wuppertal                           | 460 |
| Topic 26 | water, basement, high, see, damage, flooded, dry, photo, house, cellar                                  | 301 |
| Topic 27 | fire, leverkusen, explosion, brigade, bait, dog, poison, waste, operation, friesenhagen                 | 201 |
| Topic 28 | flood, rain, floods, water, weather, flooding, storm, heavy, flooded, like                              | 540 |
| Topic 29 | direction, near, lummen, blocked, accident, lane, brussels, closed, ranst, stop                         | 235 |
| Topic 30 | good, strength, thank, family, luck, everyone, keep, people, fingers, thanks                            | 369 |

Topic Stability over 20 Topic Modelling Iterations

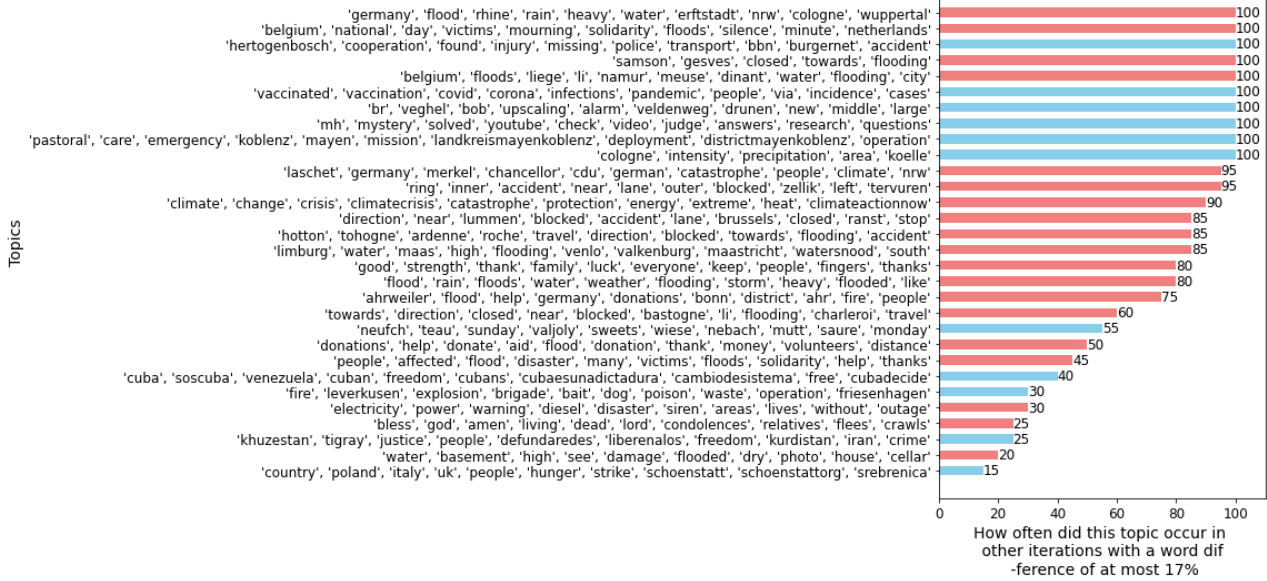

5

**Figure S2. Topic stability in percent of all iteration, for the topics in the iteration with the most stable topics. The percentages indicate across how many iterations this topic emerged with a maximum difference of 17%. The red bars depict the topics selected for further analysis.**

### Flood characteristics

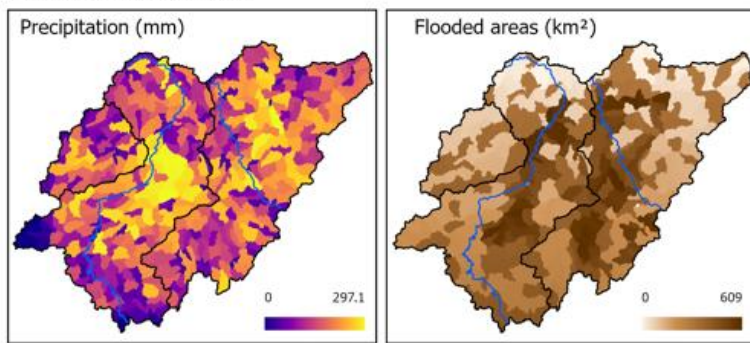

### Watershed characteristics

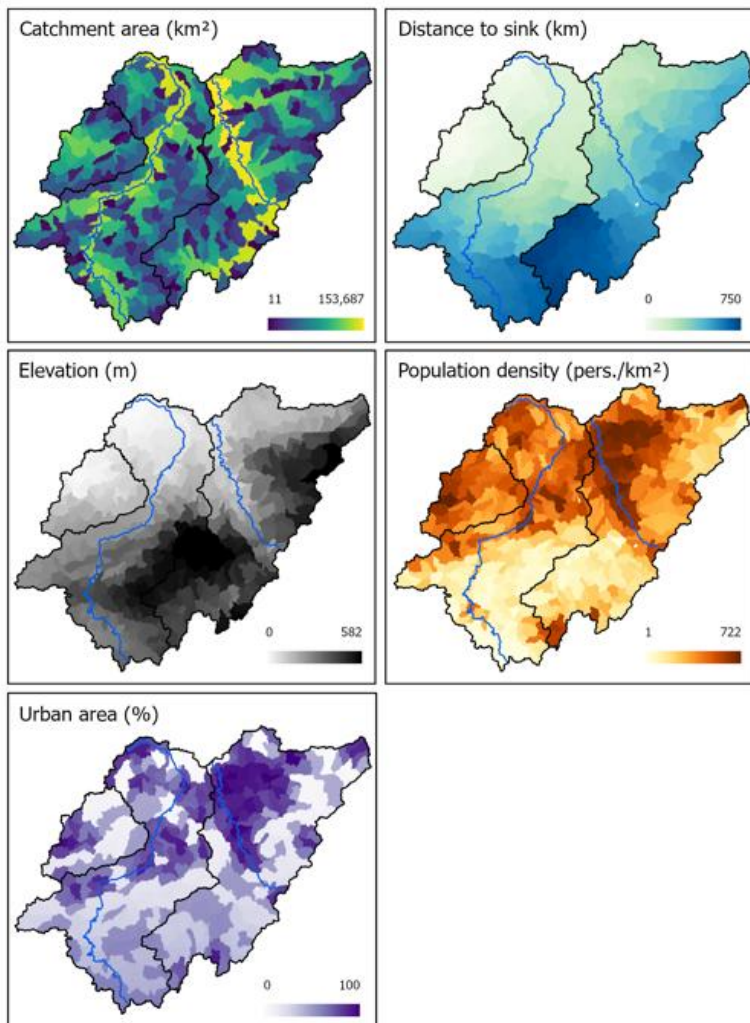

10 **Figure S3.** Map of variables analysed to describe the flood and watershed characteristics across three main river basins (Escaut, Meuse, and Rhine). Variables are classified using a quantile method (100 classes).
